# Supplementary material for: Elevated atmospheric CO 2 and vegetation structural changes contributed to GPP increase more than climate and forest cover changes in subtropical forests of China
Source: Copernicus journal article supplement (doi:10.5194/bg-2023-140), 2023-09-22
Supplement: Supplementary file 1 [file bg-2023-140-supplement.pdf]

# Elevated atmospheric CO<sub>2</sub> and vegetation structural changes contributed to GPP increase more than climate and forest cover changes in subtropical forests of China

Tao Chen<sup>1,2,\*</sup>, Félicien Meunier<sup>2</sup>, Marc Peaucelle<sup>3</sup>, Guoping Tang<sup>1,\*</sup>, Ye Yuan<sup>4</sup>, Hans Verbeeck<sup>2</sup>

- 5    1. Carbon-Water Research Station in Karst Regions of Northern Guangdong, School of Geography and Planning, Sun Yat-Sen University, Guangzhou 510006, China
2. CAVElab – Computational and Applied Vegetation Ecology, Department of Environment, Ghent University, Ghent 9000, Belgium
3. INRAE, Université de Bordeaux, UMR 1391 ISPA, 33140 Villenave-d’Ornon, France
- 10    4. State Key Laboratory of Desert and Oasis Ecology, Xinjiang Institute of Ecology and Geography, Chinese Academy of Sciences, Urumqi 830011, China

\*Corresponding to: Tao Chen (chent265@mail2.sysu.edu.cn); Guoping Tang (tanggp3@mail.sysu.edu.cn)

15

## Contents of this file

Text S1 (description of the photosynthesis model in the BEPS model)

Tables S1 to S6

Figures S1 to S11

20

25

30

### Text S1 (description of the photosynthesis model)

35

The photosynthesis of sunlit and shaded leaves  $A$  (i.e.,  $A_{sun}$  (unit:  $\mu\text{mol m}^{-2} \text{s}^{-1}$ ) and  $A_{shade}$  (unit:  $\mu\text{mol m}^{-2} \text{s}^{-1}$ )) can be calculated as follows:

$$A = \min(A_c, A_j) - 0.015 \times V_m \quad (\text{S1})$$

where  $A_c$  denotes the Rubisco-limited gross photosynthesis rate ( $\mu\text{mol m}^{-2} \text{s}^{-1}$ ) and is computed as Eq. S2;  $A_j$  is the RuBP-limited gross photosynthesis rate ( $\mu\text{mol m}^{-2} \text{s}^{-1}$ ) and is calculated as Eq. S3.

$$A_c = V_m \frac{C_i - \Gamma}{C_i + K} \quad (\text{S2})$$

$$A_j = J \frac{C_i - \Gamma}{4.5C_i + 10.5\Gamma} \quad (\text{S3})$$

40

where  $C_i$  is the intercellular  $\text{CO}_2$  (Pa);  $K$  is a function of enzyme kinetics (Pa) and is calculated as  $K = K_C \times \left(1 + \frac{O_2}{K_O}\right)$ ;  $O_2$  is oxygen concentrations in the atmosphere (Pa);  $K_C$  and  $K_O$  are the Michaelis-Menten constants for  $\text{CO}_2$  (Pa) and  $\text{O}_2$  (Pa), respectively;  $\Gamma$  denotes the  $\text{CO}_2$  compensation point without dark respiration (Pa) and is calculated as  $\Gamma = 4.04 \times 1.75^{(T_a - 25)/10}$ ;  $V_{max}$  is the maximum carboxylation rate ( $\mu\text{mol m}^{-2} \text{s}^{-1}$ ) and  $J$  represents the electron transport rate ( $\mu\text{mol m}^{-2} \text{s}^{-1}$ ). The

45

corresponding formulas for  $V_m$  and  $J$  are as follows:

$$V_m = V_{max25} \times 2.4 \frac{T_a - 25}{10} f(T_a) f(N) \quad (\text{S4})$$

$$f(T_a) = \left\{ 1 + \exp \left[ \frac{-220000 + 710 \times (T_a + 273)}{8.314 \times (T_a + 273)} \right] \right\}^{-1} \quad (\text{S5})$$

$$J = (29.1 + 1.64V_m) \times PPFD / (PPFD + 2.1 \times (29.1 + 1.64V_m)) \quad (\text{S6})$$

where  $V_{max25}$  is the maximum carboxylation rate at  $25^\circ\text{C}$  ( $\mu\text{mol m}^{-2} \text{s}^{-1}$ );  $T_a$  is air temperature ( $^\circ\text{C}$ );  $f(N)$  is the function of nitrogen (N) and is usually set to 0.5 in BEPS model (Liu et al., 1999; Zhang et al., 2018), which can adjust the photosynthesis rate for foliage nitrogen (Bonan, 1995). The  $PPFD$  is the photosynthesis photon flux density ( $\mu\text{mol m}^{-2} \text{s}^{-1}$ ).

50

**Table S1** Information description of flux tower sites in subtropical forest ecosystems in China.

| Site name         | Vegetation type                                  | Longitude | Latitude | Time range | Reference                          |
|-------------------|--------------------------------------------------|-----------|----------|------------|------------------------------------|
| Ailaoshan (ALS)   | Subtropical evergreen broad-leaved forest (EBF)  | 101.029°E | 24.538°N | 2009–2013  | Qi et al. (2020); Yu et al. (2006) |
| Dinghushan (DHS)  | Subtropical evergreen broad-leaved forest (EBF)  | 112.534°E | 23.174°N | 2003–2010  | Yu et al. (2006)                   |
| Qianyanzhou (QYZ) | Subtropical evergreen needle-leaved forest (ENF) | 115.067°E | 26.733°N | 2003–2010  | Yu et al. (2006)                   |

55

60

65

70

75

80

85 **Table S2** The mean ( $\pm$  standard deviation) of  $V_{cmax25}$  for different plant functional types (PFTs) calculated from the remote sensing-derived  $V_{cmax25}$  products (i.e., multi-year average) in China's subtropical forest ecosystems.

| PFTs         | Unit                    | EBF               | DBF              | ENF              | MXF              |
|--------------|-------------------------|-------------------|------------------|------------------|------------------|
| $V_{cmax25}$ | $\mu mol m^{-2} s^{-1}$ | $38.55 \pm 10.14$ | $35.70 \pm 6.22$ | $38.47 \pm 8.32$ | $33.36 \pm 7.96$ |

90

95

100

105

110

115

**Table S3** Details of the published GPP products were used for model comparison.

| Dataset    | Time Range | Spatial Resolution | Method                                                | Source                                                                                                                                                      | References                           |
|------------|------------|--------------------|-------------------------------------------------------|-------------------------------------------------------------------------------------------------------------------------------------------------------------|--------------------------------------|
| MODIS GPP  | 2000-2022  | 500 m              | The MOD17 Algorithm                                   | <a href="https://ladsweb.modaps.eosdis.nasa.gov/archive/allData/6/MOD17A2H/">https://ladsweb.modaps.eosdis.nasa.gov/archive/allData/6/MOD17A2H/</a>         | Running et al. (2015)                |
| EC-LUE GPP | 1982–2018  | 0.05°              | Light use efficiency (LUE)-based model                | <a href="https://doi.org/10.6084/m9.figshare.8942336.v3">https://doi.org/10.6084/m9.figshare.8942336.v3</a> .                                               | Zheng et al. (2020)                  |
| NIRv GPP   | 1982–2018  | 0.05°              | Machine learning method                               | <a href="https://doi.org/10.6084/m9.figshare.12981977.v2">https://doi.org/10.6084/m9.figshare.12981977.v2</a> .                                             | Wang et al. (2021)                   |
| VPM GPP    | 2000-2016  | 0.05°              | Light use efficiency (LUE)-based model                | <a href="https://figshare.com/articles/dataset/Annual_GPP_at_0_5_degree/5048005">https://figshare.com/articles/dataset/Annual_GPP_at_0_5_degree/5048005</a> | Zhang et al. (2017)                  |
| BEPS GPP   | 1982–2019  | 0.072727°          | Process-based biophysical model (original BEPS model) | <a href="http://www.nesdc.org.cn/sdo/detail?id=612f42ee7e28172cbcd3d809">http://www.nesdc.org.cn/sdo/detail?id=612f42ee7e28172cbcd3d809</a>                 | Chen et al. (2019); He et al. (2021) |

**Table S4** Comparison of simulated daily GPP vs. observed daily GPP<sub>EC</sub> for all three sites in each year.

| Sites | Time period | R <sup>2</sup> | RMSE (g C m <sup>-2</sup> day <sup>-1</sup> ) | MBE (g C m <sup>-2</sup> day <sup>-1</sup> ) |
|-------|-------------|----------------|-----------------------------------------------|----------------------------------------------|
| ALS   | 2009        | <b>0.50</b>    | 1.69                                          | -0.01                                        |
|       | 2010        | 0.72           | 1.56                                          | -0.10                                        |
|       | 2011        | 0.66           | 1.49                                          | -0.11                                        |
|       | 2012        | 0.53           | 1.50                                          | -0.14                                        |
|       | 2013        | 0.53           | 1.57                                          | 0.17                                         |
|       | Overall     | 0.58           | 1.57                                          | -0.04                                        |
| DHS   | 2003        | 0.44           | 1.09                                          | 0.38                                         |
|       | 2004        | 0.58           | 0.95                                          | -0.01                                        |
|       | 2005        | 0.65           | 1.24                                          | 0.88                                         |
|       | 2006        | 0.49           | 1.21                                          | 0.44                                         |
|       | 2007        | 0.47           | 1.16                                          | 0.01                                         |
|       | 2008        | 0.43           | 1.20                                          | -0.22                                        |
|       | 2009        | 0.43           | 1.21                                          | 0.48                                         |
|       | 2010        | 0.49           | 1.05                                          | 0.01                                         |
|       | Overall     | 0.44           | 1.17                                          | 0.24                                         |
| QYZ   | 2003        | 0.77           | 1.27                                          | -0.40                                        |
|       | 2004        | 0.85           | 1.12                                          | 0.18                                         |
|       | 2005        | 0.84           | 1.06                                          | 0.03                                         |
|       | 2006        | 0.78           | 1.42                                          | -0.00                                        |
|       | 2007        | 0.71           | 1.46                                          | -0.62                                        |
|       | 2008        | 0.79           | 1.34                                          | -0.38                                        |
|       | 2009        | 0.76           | 1.40                                          | -0.40                                        |
|       | 2010        | 0.70           | 1.60                                          | -0.64                                        |
|       | Overall     | 0.77           | 1.36                                          | -0.29                                        |

120

125

130

135 **Table S5** Comparison of simulated daily NEP vs. observed daily NEP for all three sites in each year.

| Sites   | Time period | R <sup>2</sup> | RMSE (g C m <sup>-2</sup> day <sup>-1</sup> ) | MBE (g C m <sup>-2</sup> day <sup>-1</sup> ) |
|---------|-------------|----------------|-----------------------------------------------|----------------------------------------------|
| ALS     | 2009        | 0.21           | 1.69                                          | 0.01                                         |
|         | 2010        | 0.20           | 1.54                                          | 0.04                                         |
|         | 2011        | 0.21           | 1.49                                          | -0.07                                        |
|         | 2012        | 0.37           | 1.21                                          | -0.10                                        |
|         | 2013        | 0.24           | 1.29                                          | 0.27                                         |
|         | Overall     | 0.25           | 1.46                                          | 0.02                                         |
| DHS     | 2003        | 0.41           | 1.08                                          | 0.37                                         |
|         | 2004        | 0.45           | 0.95                                          | -0.01                                        |
|         | 2005        | 0.42           | 1.25                                          | 0.86                                         |
|         | 2006        | 0.38           | 1.21                                          | 0.42                                         |
|         | 2007        | 0.26           | 1.16                                          | -0.01                                        |
|         | 2008        | 0.26           | 1.20                                          | -0.18                                        |
|         | 2009        | 0.49           | 1.21                                          | 0.54                                         |
|         | 2010        | 0.38           | 1.05                                          | 0.01                                         |
|         | Overall     | 0.35           | 1.14                                          | 0.24                                         |
|         | QYZ         | 2003           | 0.33                                          | 1.27                                         |
| 2004    |             | 0.57           | 1.12                                          | 0.17                                         |
| 2005    |             | 0.54           | 1.06                                          | 0.03                                         |
| 2006    |             | 0.48           | 1.42                                          | 0.07                                         |
| 2007    |             | 0.36           | 1.46                                          | -0.04                                        |
| 2008    |             | 0.46           | 1.31                                          | 0.12                                         |
| 2009    |             | 0.36           | 1.40                                          | 0.04                                         |
| 2010    |             | 0.27           | 1.60                                          | -0.09                                        |
| Overall |             | 0.42           | 1.34                                          | 0.04                                         |

145 **Table S6** Land-cover change transition matrix for the 2001–2018 period in the subtropical region of China. EBF: evergreen needle-leaved forest; DBF: deciduous broad-leaved forest; ENF: evergreen needle-leaved forest; MF: mixed forest; CRO: cropland; GRA: grassland; SHR: shrubland; URB: urban; and BAR: bare land. Green and red arrows indicate a net increase and a net decrease, respectively.

|                                        |               | 2018 ( $\times 10^3$ km <sup>2</sup> ) |                |               |                |               |                |               |               |       | Total   | Losses |
|----------------------------------------|---------------|----------------------------------------|----------------|---------------|----------------|---------------|----------------|---------------|---------------|-------|---------|--------|
|                                        |               | EBF                                    | DBF            | ENF           | MXF            | CRO           | GRA            | SHR           | URB           | BAR   |         |        |
| 2001 ( $\times 10^3$ km <sup>2</sup> ) | <b>EBF</b>    | 551.08                                 | 0.38           | 1.72          | 7.79           | 3.03          | 0.13           | 0.42          | 0.00          | 0.10  | 564.66  | 13.57  |
|                                        | <b>DBF</b>    | 0.64                                   | 89.62          | 0.16          | 2.97           | 0.26          | 0.03           | 0.03          | 0.03          | 0.00  | 93.74   | 4.12   |
|                                        | <b>ENF</b>    | 3.48                                   | 0.06           | 492.41        | 19.04          | 13.10         | 0.80           | 0.32          | 0.29          | 0.03  | 529.52  | 37.11  |
|                                        | <b>MXF</b>    | 8.50                                   | 1.12           | 10.73         | 275.61         | 3.00          | 0.48           | 0.13          | 1.72          | 0.16  | 301.44  | 25.84  |
|                                        | <b>CRO</b>    | 12.33                                  | 2.14           | 4.18          | 4.63           | 1089.49       | 0.80           | 0.64          | 34.75         | 1.53  | 1150.49 | 61.00  |
|                                        | <b>GRA</b>    | 0.29                                   | 0.10           | 1.57          | 1.98           | 0.67          | 127.85         | 0.00          | 4.95          | 0.10  | 137.50  | 9.65   |
|                                        | <b>SHR</b>    | 5.59                                   | 0.67           | 2.17          | 1.02           | 3.39          | 0.10           | 9.58          | 0.22          | 0.10  | 22.84   | 13.25  |
|                                        | <b>URB</b>    | 0.00                                   | 0.00           | 0.00          | 0.00           | 0.03          | 0.00           | 0.00          | 23.76         | 0.00  | 23.79   | 0.03   |
|                                        | <b>BAR</b>    | 0.10                                   | 0.03           | 0.00          | 0.06           | 0.67          | 0.10           | 0.83          | 0.93          | 56.18 | 58.90   | 2.71   |
|                                        | <b>Total</b>  | 582.00                                 | 94.13          | 512.95        | 313.10         | 1113.63       | 130.28         | 11.95         | 66.66         | 58.19 | –       | –      |
| <b>Gains</b>                           | 30.92         | 4.50                                   | 20.54          | 37.50         | 24.15          | 2.43          | 2.36           | 42.89         | 2.01          | –     | –       |        |
| <b>Net changes</b>                     | <b>17.34↑</b> | <b>0.38↑</b>                           | <b>-16.58↓</b> | <b>11.66↑</b> | <b>-36.86↓</b> | <b>-7.22↓</b> | <b>-10.89↓</b> | <b>42.86↑</b> | <b>-0.70↓</b> | –     | –       |        |

150

155



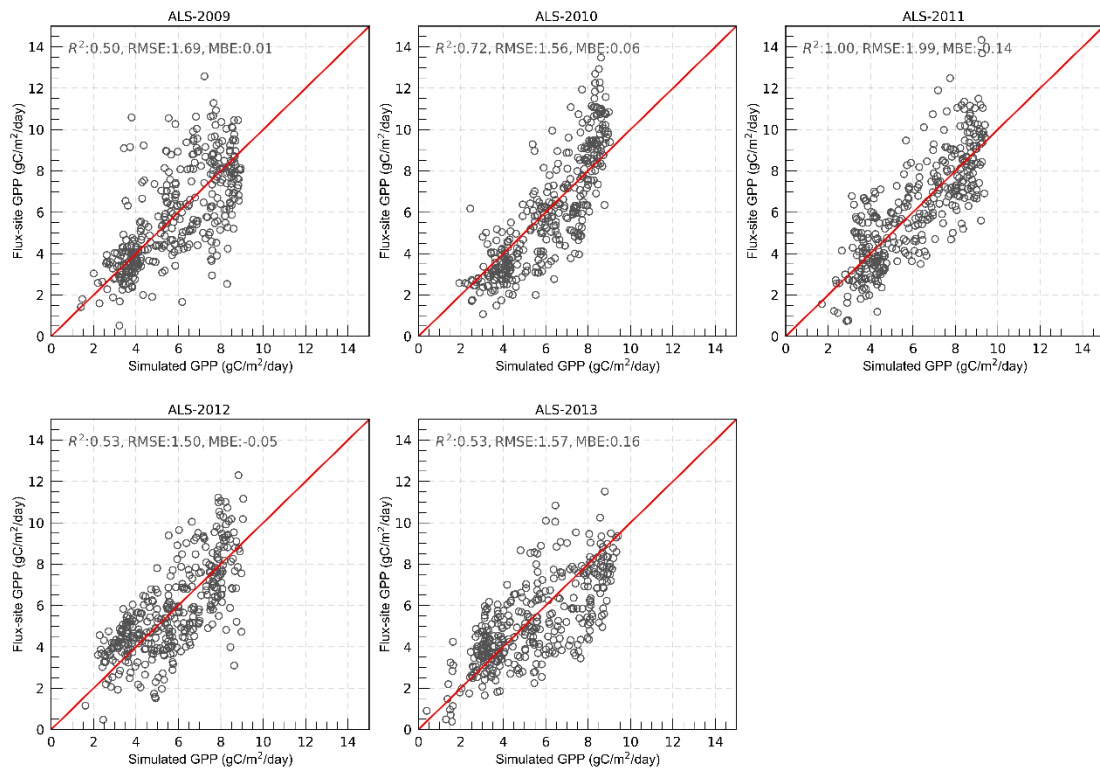

160

**Figure S1** Scatter plots show the year-to-year (2009-2013) comparison between the simulated and observed daily GPP in the Ailao Shan flux tower station (ALS). The red line denotes the 1:1 line.

165

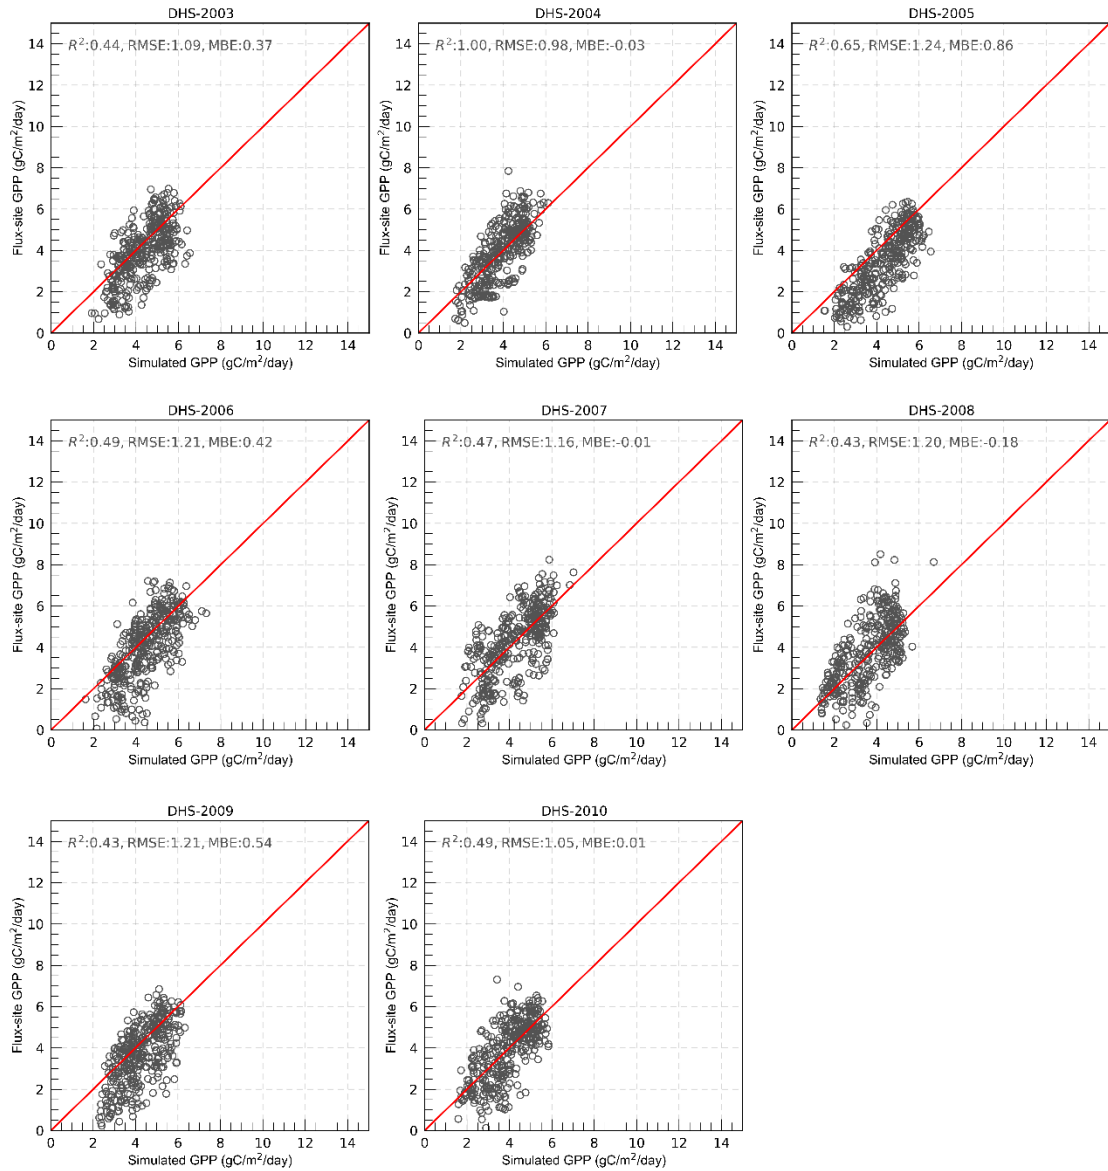

**Figure S2** Scatter plots show the year-to-year (2003-2010) comparison between the daily simulated GPP with observed GPP in Dinghu Shan flux tower station (DHS).

170

175

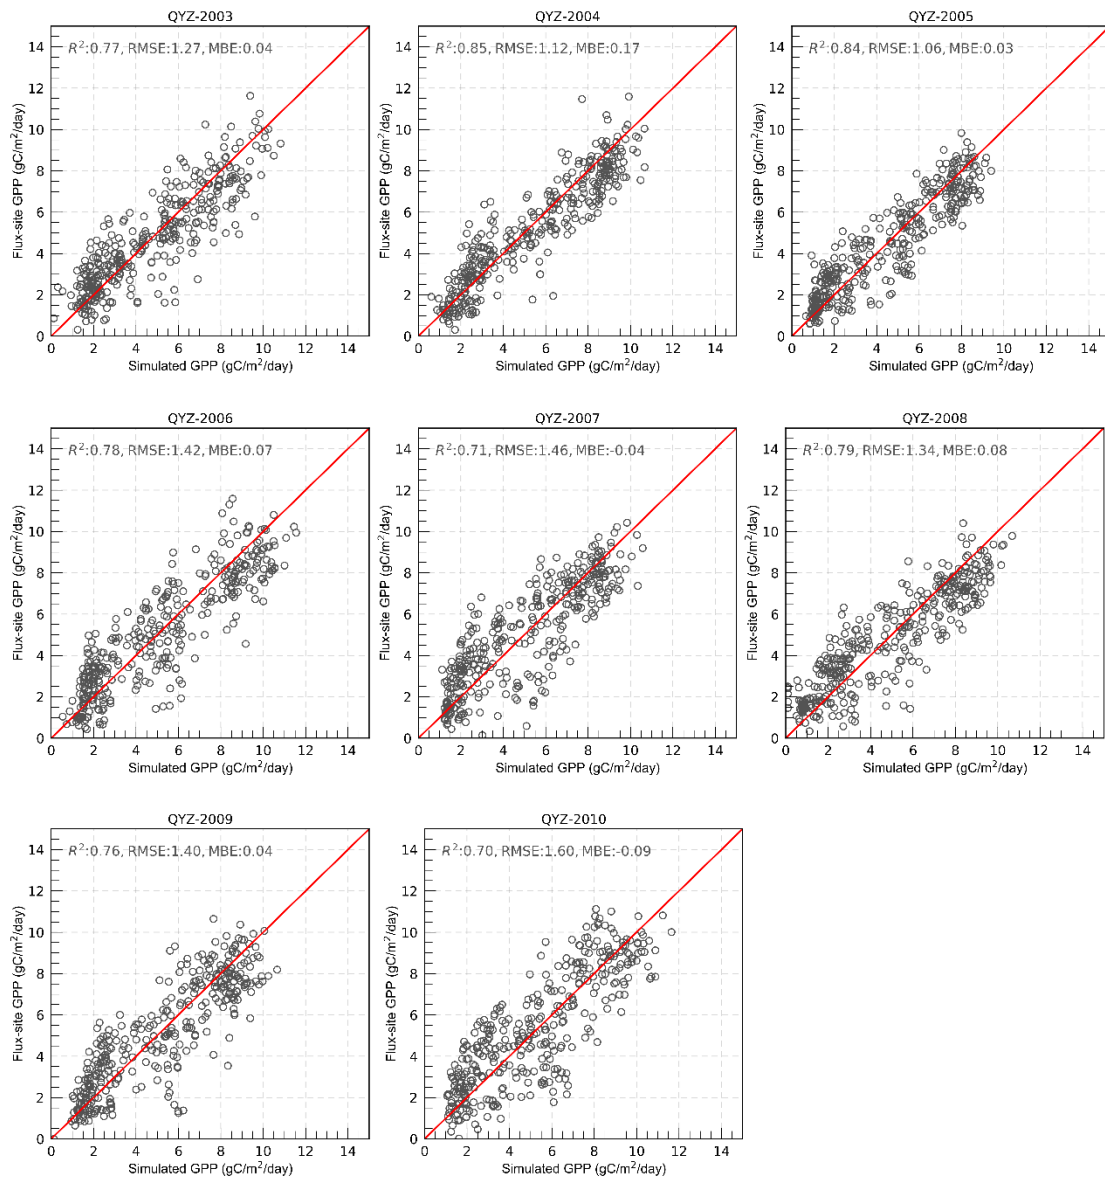

180 **Figure S3** Scatter plots show the year-to-year (2003-2010) comparison between the daily simulated GPP with observed GPP in Qianyan Zhou flux tower station (QYZ).

185

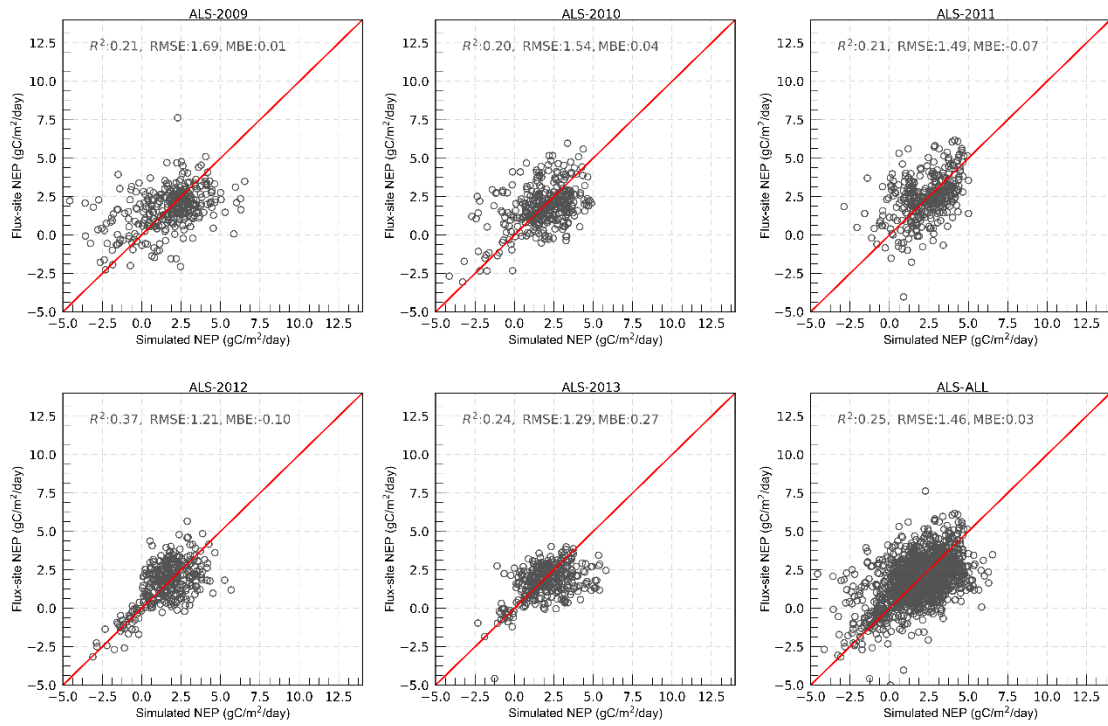

190

**Figure S4** Scatter plots show the year-to-year (2009-2013) comparison between the daily simulated NEP with observed NEP in the Ailao Shan flux tower station (ALS). The red line denotes the 1:1 line.

195

200

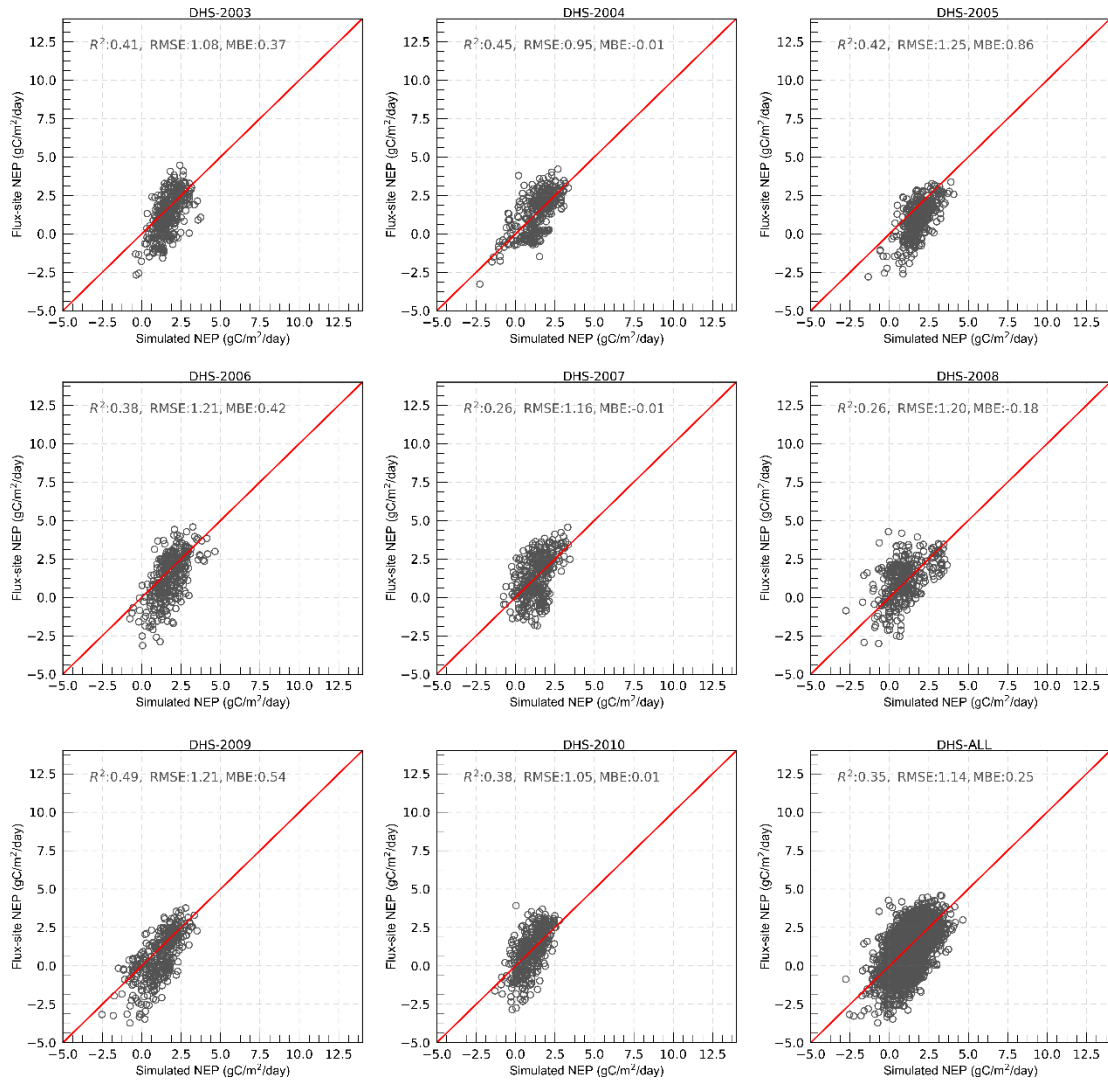

**Figure S5** Scatter plots show the year-to-year (2003-2010) comparison between the daily simulated NEP with observed NEP in Dinghu Shan flux tower station (DHS). The red line denotes the 1:1 line.

205

210

215

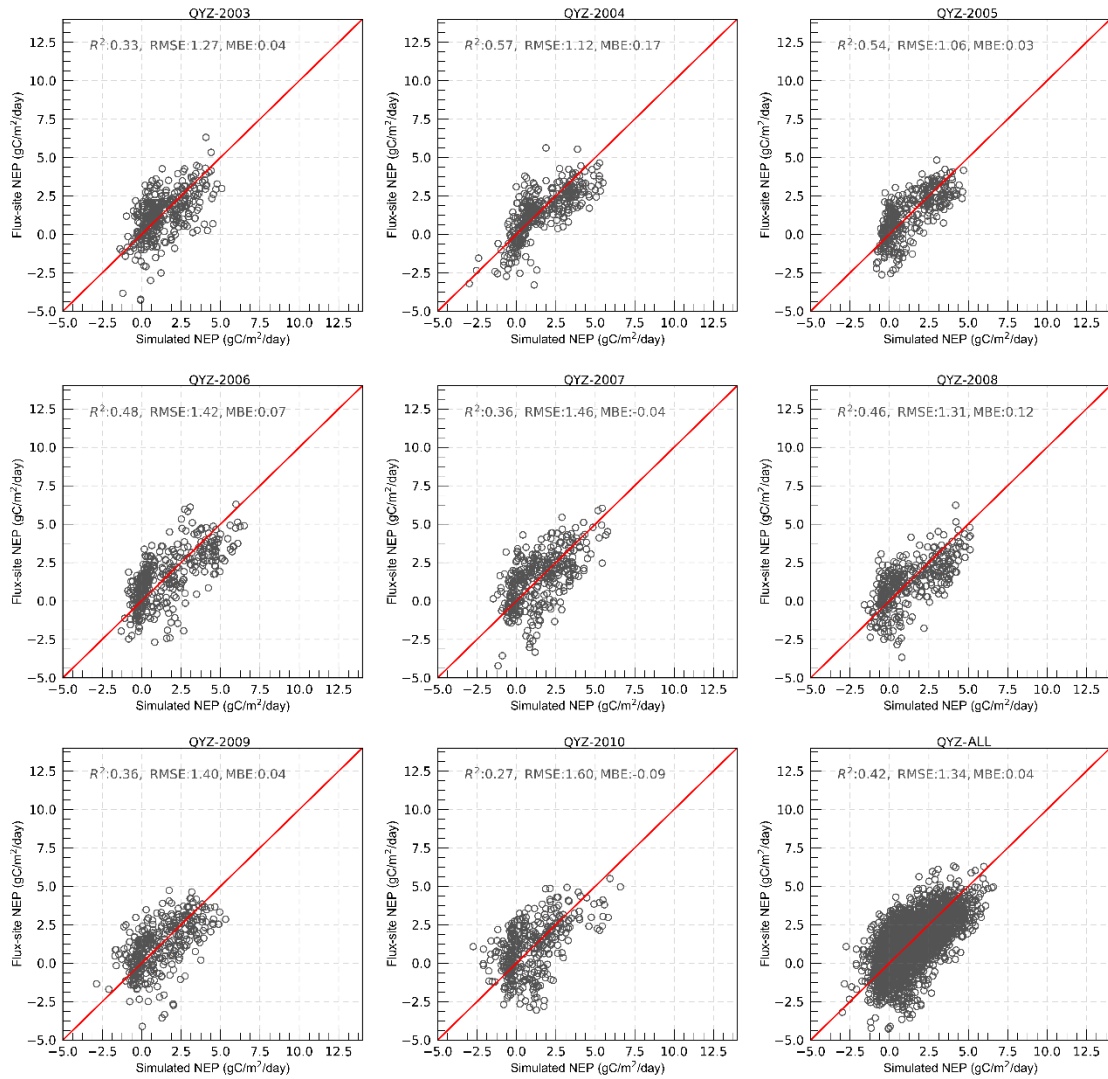

**Figure S6** Scatter plots show the year-to-year (2003–2010) comparison between the daily simulated NEP with observed NEP in Qianyan Zhou flux tower station (QYZ). The red line denotes the 1:1 line.

220

225



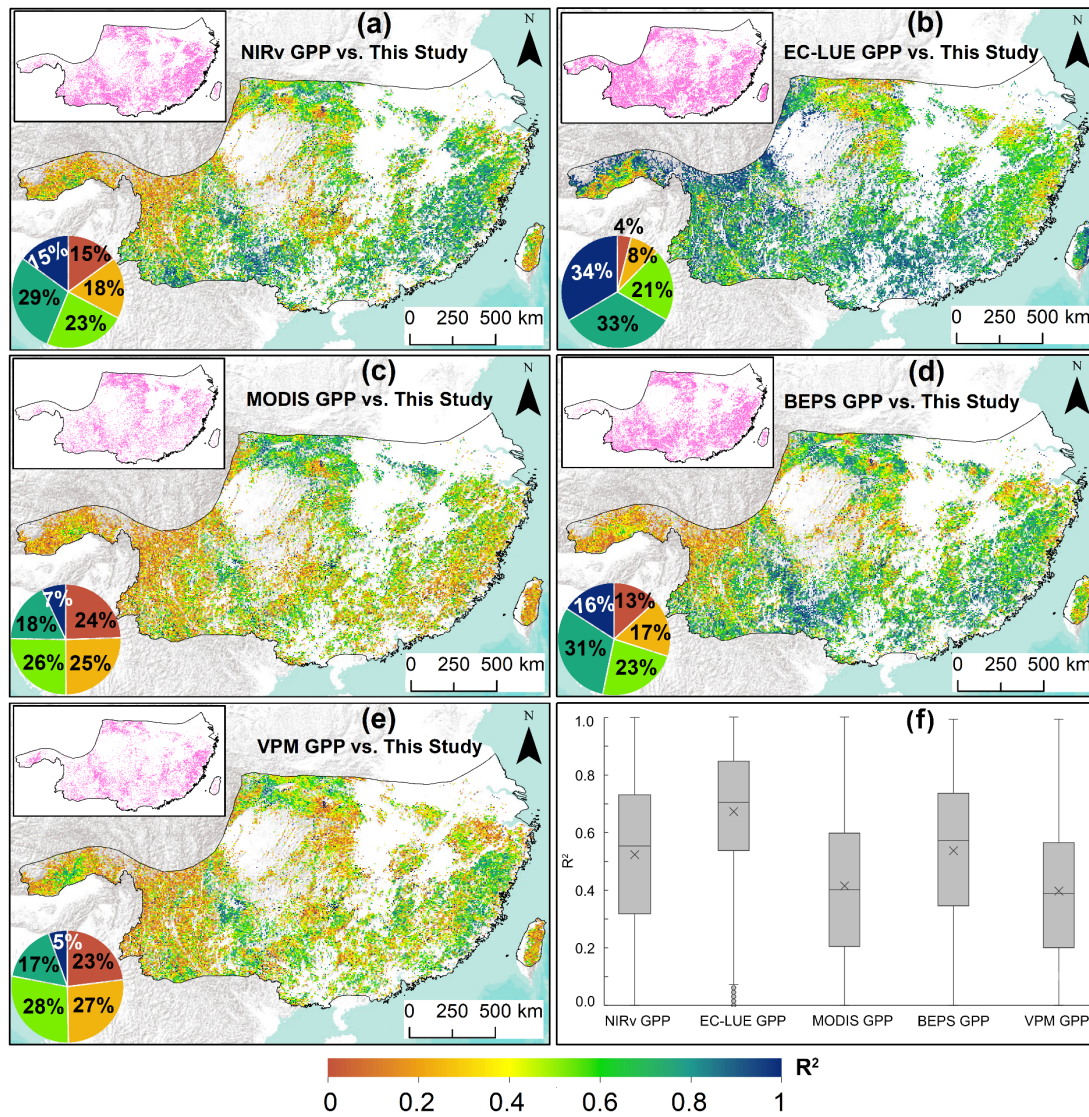

230 **Figure S7** Spatial distribution of the determination coefficient ( $R^2$ ) between our simulated GPP and five  
 GPP products at annual scale (a-e). The insert pie charts represent the ratios of different  $R^2$ , which  
 corresponds to the color bar. (f) Box chart is statistical results of  $R^2$  between our simulated GPP and five  
 GPP products. The black horizontal line in the boxplot is the median, and the cross represents the mean.  
 Insets in (a-e) represent the subset of pixels where our simulated GPP is significantly correlated with the  
 five GPP products at the  $P < 0.05$  confidence level.

235

240

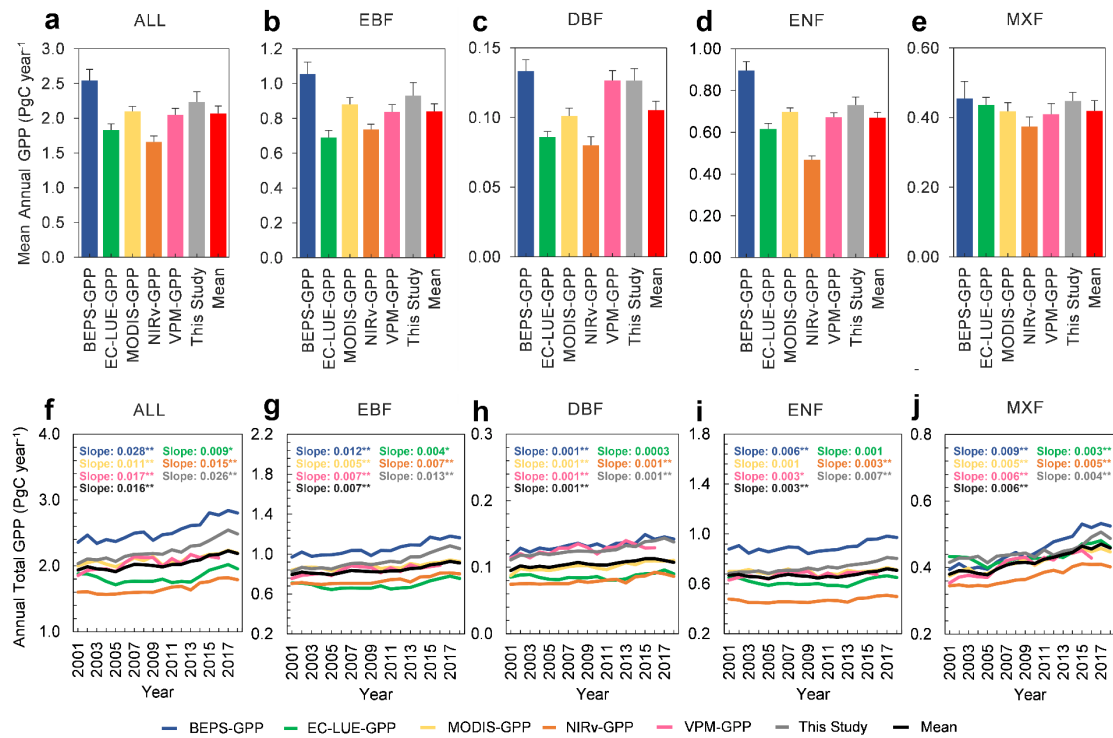

**Figure S8** Comparison of the multi-year mean of annual total GPP (a-e) and the annual GPP trends (f-g) between our simulated GPP and other five published GPP products for the entire study area and different forest types. The VPM GPP can be available from 2001 to 2016 and thus the multi-year mean of annual VPM is calculated from the period 2001-2016. The grey bar in (a-e) is the standard deviation (SD). The mean denotes the average of five products. EBF: evergreen needleleaf forest; DBF: deciduous broadleaf forest; ENF: evergreen needleleaf forest; MF: mixed forest.

250

255



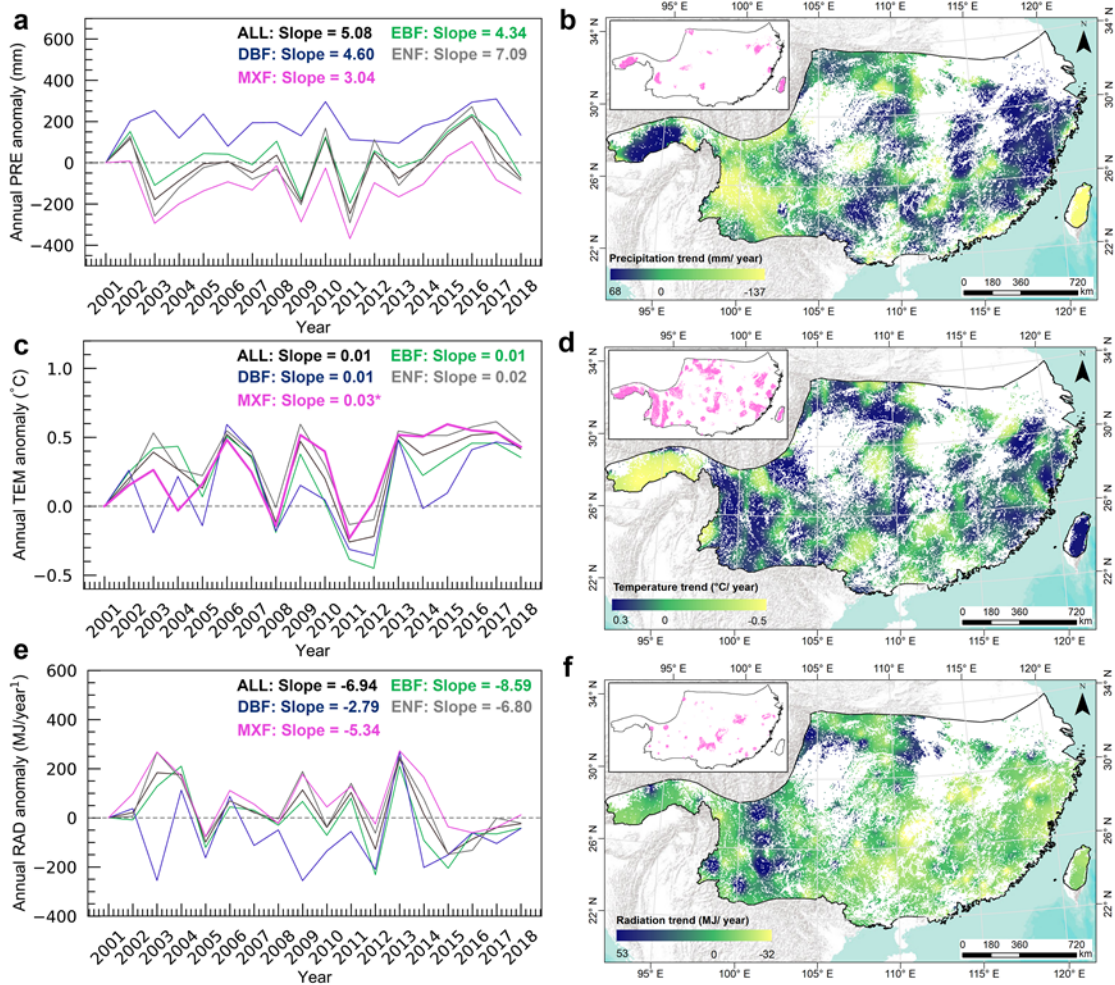

260

**Figure S9** Annual variations of the major climate variables on the entire forest area and different forest areas from 2001 to 2018. The left column is the temporal changes of annual total precipitation anomaly (a), annual mean temperature anomaly (c), and annual total radiation anomaly (e), respectively. The right column is the spatial distribution of annual total precipitation trends (b), annual mean temperature trends (d), and annual total radiation trends (f), respectively. The anomalies are all relative to the base year 2001. Insets in (b), (d), and (f) denote the subset of pixels with significant annual precipitation, temperature, and radiation changes at  $P < 0.05$ . EBF: evergreen needleleaf forest; DBF: deciduous broadleaf forest; ENF: evergreen needleleaf forest; MF: mixed forest.

265

270

275

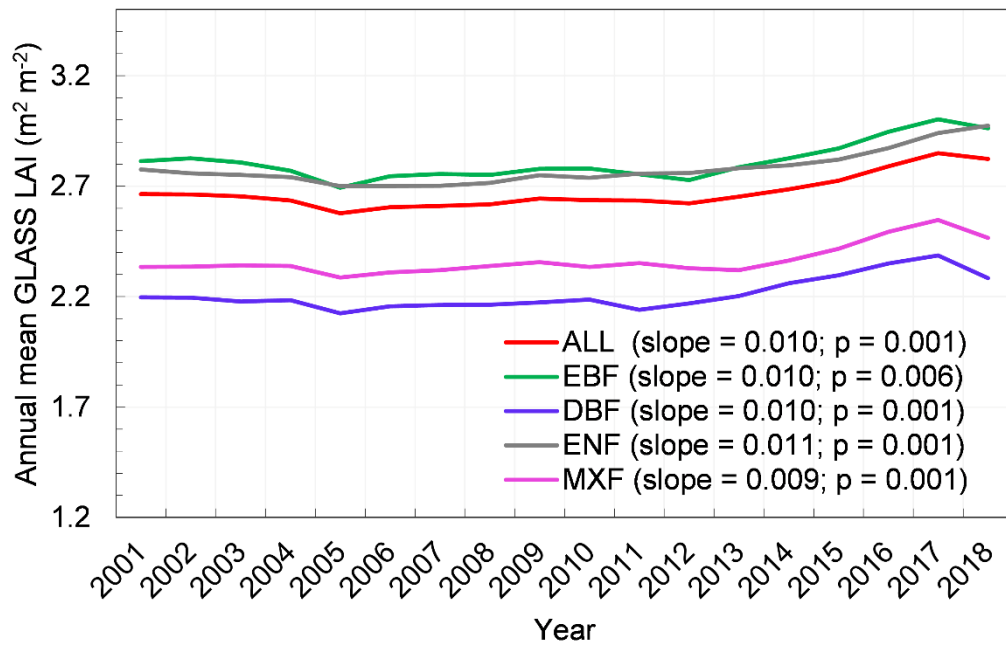

**Figure S10** Annual changes of GLASS LAI for entire forest region and different forest types. EBF: evergreen needleleaf forest; DBF: deciduous broadleaf forest; ENF: evergreen needleleaf forest; MF: mixed forest.

280

285

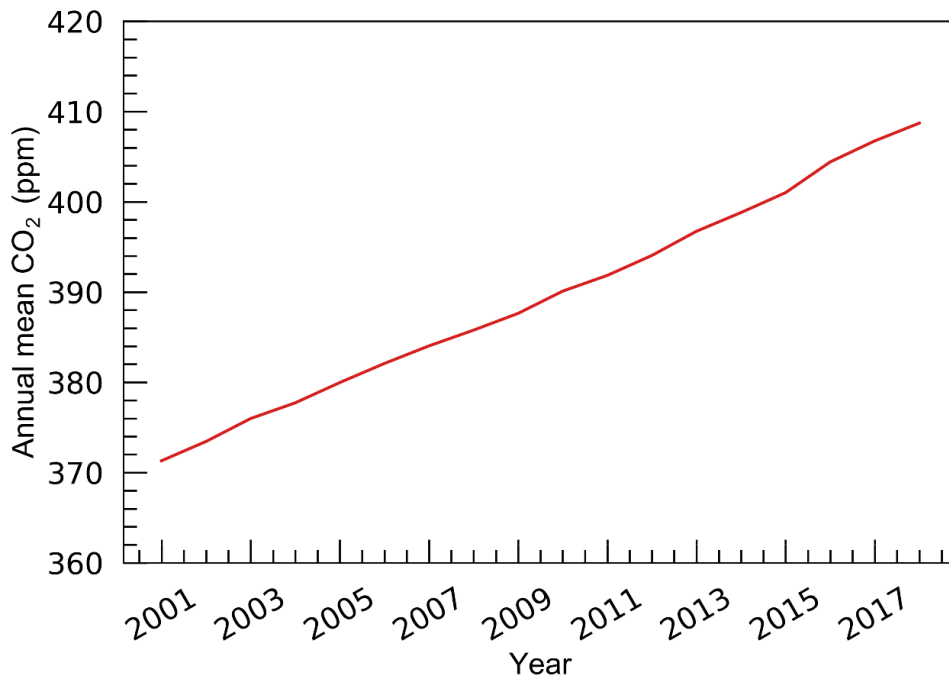

290

**Figure S11** Temporal changes of annual mean CO<sub>2</sub> concentration from 2001 to 2018.

295

300

305

## References

- 310 Bonan, G.B., 1995. Land-atmosphere CO<sub>2</sub> exchange simulated by a land surface process model coupled to an atmospheric general circulation model *Journal of Geophysical Research*, 100(D2): 2817-2831.
- 315 Chen, J.M., Ju, W., Ciais, P., Viovy, N. and Lu, X., 2019. Vegetation structural change since 1981 significantly enhanced the terrestrial carbon sink. *Nature Communications*, 10(1): 4259.
- 320 He, Q. et al., 2021. Drought Risk of Global Terrestrial Gross Primary Productivity Over the Last 40 Years Detected by a Remote Sensing-Driven Process Model. *Journal of Geophysical Research: Biogeosciences*, 126(6): e2020JG005944.
- Liu, J., Chen, J.M., Cihlar, J. and Chen, W., 1999. Net primary productivity distribution in the BOREAS region from a process model using satellite and surface data. *Journal of Geophysical Research: Atmospheres*, 104(D22): 27735-27754.
- 325 Qi, D. et al., 2020. A dataset of carbon and water fluxes observation in subtropical evergreen broad-leaved forest in Ailao Shan from 2009 to 2013. *China Scientific Data*, 6(1). (2021-03-06). DOI: 10.11922/csdata.2020.0089.zh.
- 330 Running, S.W., Mu, Q. and Zhao, M., 2015. MOD17A2H MODIS/Terra Gross Primary Productivity 8-Day L4 Global 500m SIN Grid. NASA LP DAAC. <http://doi.org/10.5067/MODIS/MOD17A2H.006>.
- 335 Wang, S., Zhang, Y., Ju, W., Qiu, B. and Zhang, Z., 2021. Tracking the seasonal and inter-annual variations of global gross primary production during last four decades using satellite near-infrared reflectance data. *Sci Total Environ*, 755(Pt 2): 142569.
- Yu, G.-R. et al., 2006. Overview of ChinaFLUX and evaluation of its eddy covariance measurement. *Agricultural and Forest Meteorology*, 137(3-4): 125-137.
- 340 Zhang, Y. et al., 2017. A global moderate resolution dataset of gross primary production of vegetation for 2000-2016. *Scientific Data*, 4: 170165.
- Zheng, Y. et al., 2020. Improved estimate of global gross primary production for reproducing its long-term variation, 1982–2017. *Earth System Science Data*, 12(4): 2725-2746.
- 345 Zhang, S. et al., 2018. Evaluation and improvement of the daily boreal ecosystem productivity simulator in simulating gross primary productivity at 41 flux sites across Europe. *Ecological Modelling*, 368: 205-232.
